# Supplementary material for: HMGB1-RAGE Axis Makes No Contribution to Cardiac Remodeling Induced by Pressure-Overload
Source: PubMed Central journal article supplement (PMC4927190; doi:10.1371/journal.pone.0158514), 2016-06-29
Supplement: pone.0158514.s001.pdf [file pone.0158514.s001.pdf]

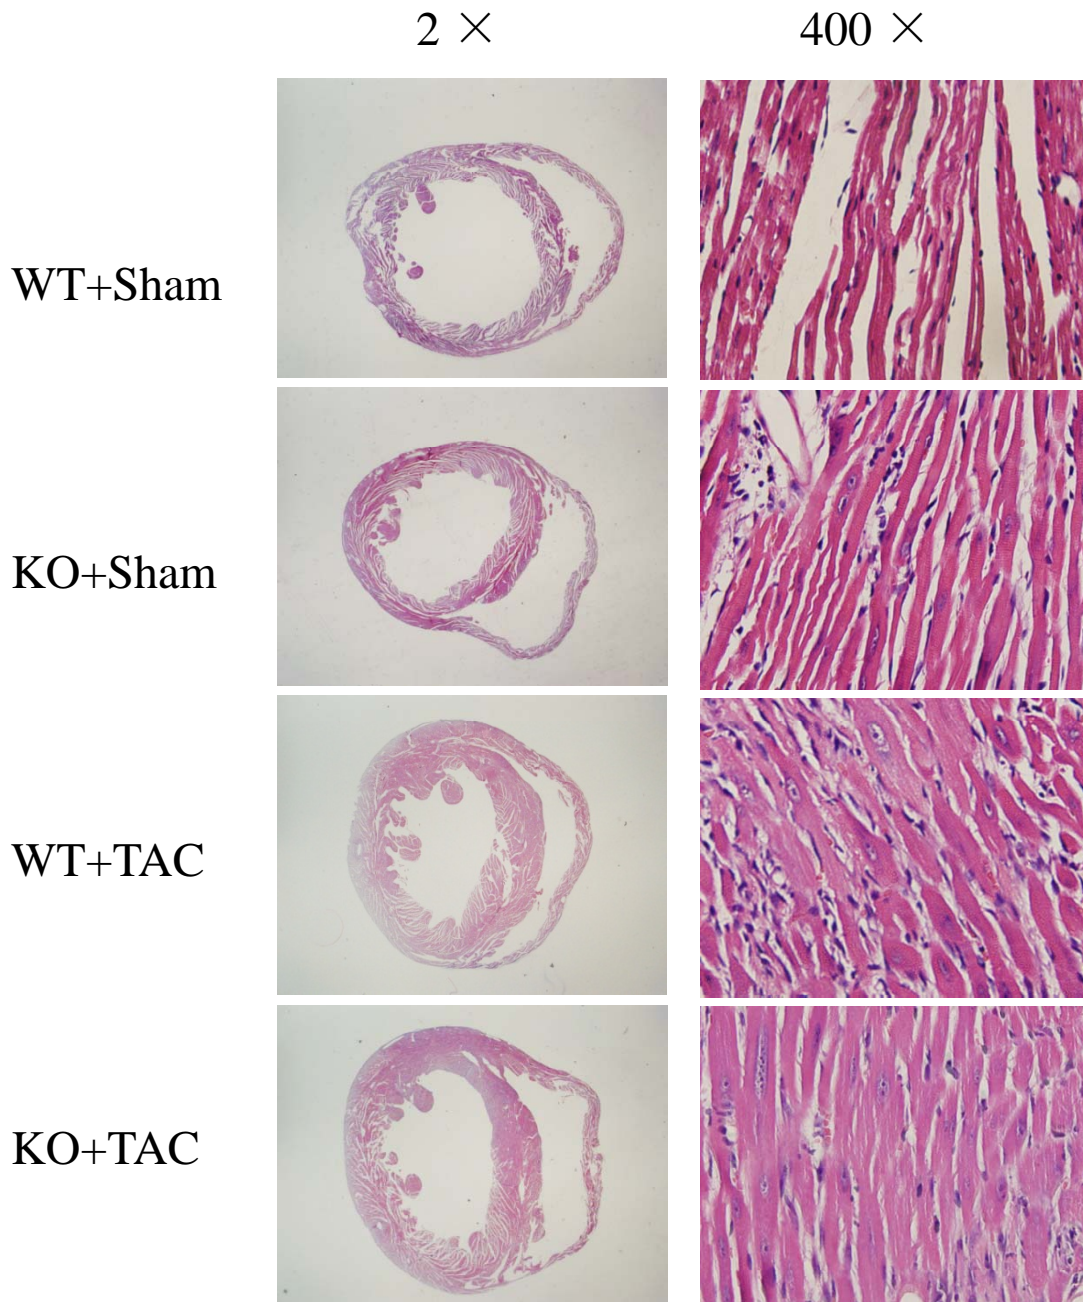

**Fig. A Representative pictures of H&E staining.** Cardiomyocyte hypertrophy in mice deficiency of receptor for advanced glycation end products (RAGE) and their wild type (WT) littermates in response to pressure overload for 1 week. KO: RAGE knockout; TAC: transverse aortic constriction.

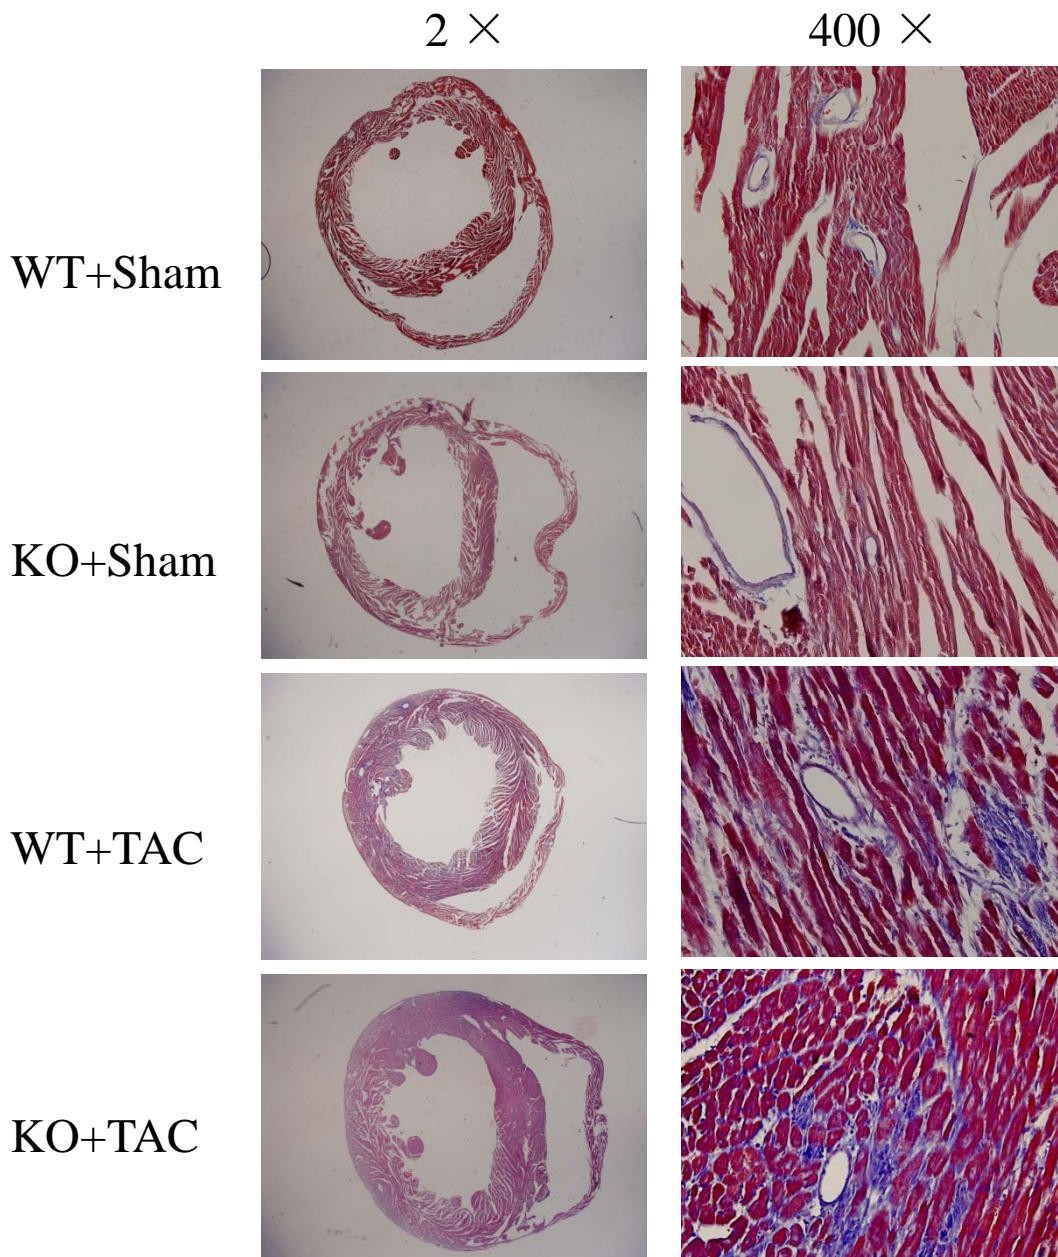

**Fig B Representative pictures of Azan-Mason staining.** Myocardial fibrosis in mice deficiency of receptor for advanced glycation end products (RAGE) and their wild type (WT) littermates in response to pressure overload for 1 week. KO: RAGE knockout; TAC: transverse aortic constriction.
